# Supplementary material for: Real-World Evidence on the Clinical Characteristics and Management of Patients with Chronic Lymphocytic Leukemia in Spain Using Natural Language Processing: The SRealCLL Study
Source: MDPI journal article supplement (doi:10.3390/cancers15164047), 2023-08-10
Supplement: s1 [file s1]

## Supplementary Materials

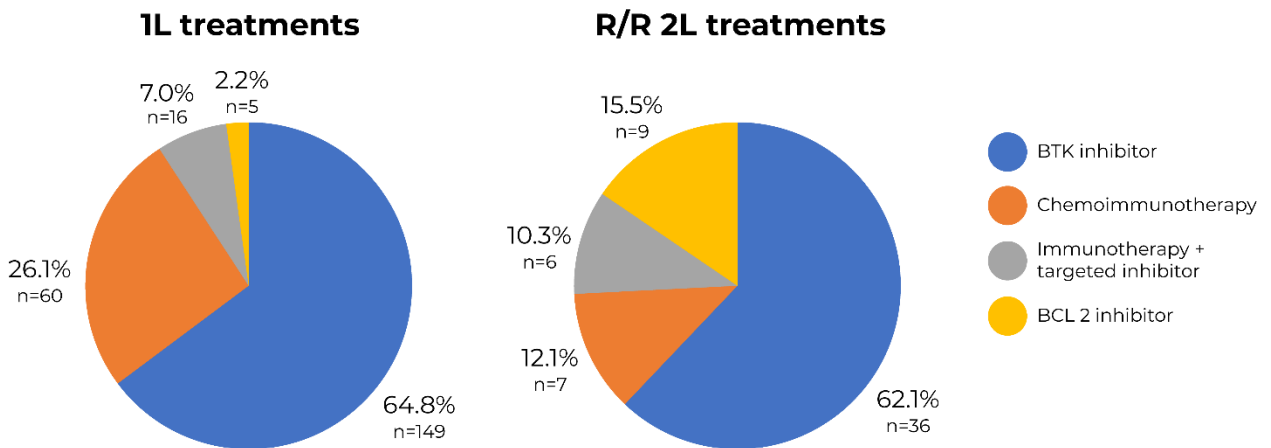

### Supplementary Figure S1. Antineoplastic treatments for chronic lymphocytic leukemia grouped by mechanism of action.

Percentage (n) of patients from the 1L (left) or R/R 2L (right) treatment groups according to their mechanism of action. Treatments were detected from index date to the last follow up. The individual treatments in each group are as follows. *BTK inhibitor*: ibrutinib; *Chemoimmunotherapy*: bendamustine + rituximab, chlorambucil + rituximab, fludarabine + cyclophosphamide + rituximab, obinutuzumab + chlorambucil; *Immunotherapy + targeted inhibitor*: venetoclax + rituximab, ibrutinib + obinutuzumab, idelalisib + rituximab; *BCL2 inhibitor*: venetoclax.

1L: first-line; 2L: second-line; R/R: relapse/refractory.

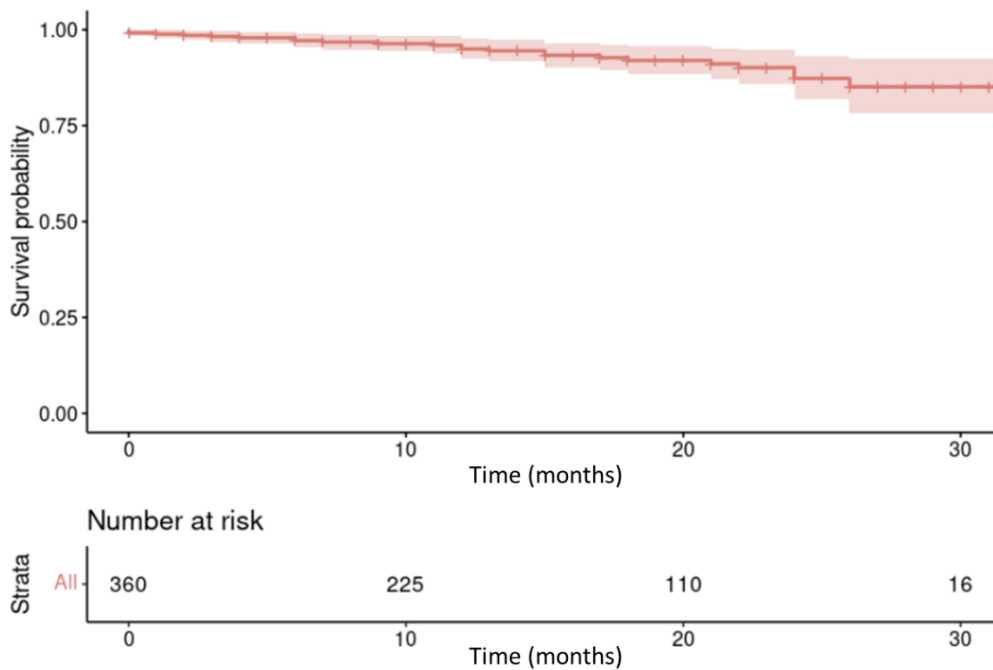

### Supplementary Figure S2. Kaplan-Meier overall survival curve of all CLL patients diagnosed during the study period.

**Supplementary Table S1. Evaluation metrics of *EHRead*® performance identifying key variables.**

|                              | <b>Recall</b> | <b>Precision</b> | <b>F1-score</b> |
|------------------------------|---------------|------------------|-----------------|
| Chronic lymphocytic leukemia | 0.987603      | 0.956            | 0.971545        |
| Idelalisib                   | 0.916667      | 0.982143         | 0.948276        |
| Ibrutinib                    | 0.904762      | 0.853933         | 0.878613        |
| Obinutuzumab †               | 0.736842      | 0.293194         | 0.419476        |

† Reading of the term “obinutuzumab” was suboptimal, since the acronym “O” was included as a synonym of this variable, leading to many false positives during *EHRead*® detection.

**Supplementary Table S2. Treatment switch matrix describing the number of patients switching from a specific first-line treatment (rows) to another second-line treatment (column).**

| <b>1L<br/>treatment</b> | <b>2L treatment</b> |            |            |            |            |            |             |             |             |
|-------------------------|---------------------|------------|------------|------------|------------|------------|-------------|-------------|-------------|
|                         | <i>BR</i>           | <i>RCI</i> | <i>FCR</i> | <i>OCI</i> | <i>IBR</i> | <i>VEN</i> | <i>VENR</i> | <i>IBRO</i> | <i>IDER</i> |
| BR                      | 0                   | 0          | 0          | 0          | 4          | 0          | 0           | 0           | 0           |
| RCI                     | 0                   | 0          | 0          | 1          | 1          | 0          | 0           | 0           | 0           |
| FCR                     | 0                   | 0          | 0          | 0          | 1          | 0          | 0           | 0           | 0           |
| OCI                     | 0                   | 1          | 0          | 0          | 1          | 0          | 0           | 0           | 0           |
| IBR                     | 1                   | 0          | 1          | 2          | 0          | 4          | 1           | 0           | 1           |
| VEN                     | 0                   | 0          | 0          | 0          | 1          | 0          | 0           | 0           | 0           |
| VENR                    | 0                   | 0          | 0          | 0          | 0          | 0          | 0           | 0           | 0           |
| IBRO                    | 0                   | 0          | 0          | 0          | 0          | 0          | 0           | 0           | 0           |
| IDER                    | 0                   | 0          | 0          | 0          | 3          | 1          | 0           | 0           | 0           |

Only treatment switches that have occurred during the study period are reflected in this matrix.

1L: first-line; 2L: second-line; BR: bendamustine+rituximab; FCR: fludarabine+cyclophosphamide+rituximab; IBR: ibrutinib; IBRO: ibrutinib+obinutuzumab; IDER: idelalisib+rituximab; OCI: obinutuzumab+chlorambucil; RCI: rituximab+chlorambucil; VEN: venetoclax; VENR: venetoclax+rituximab.
